# Supplementary material
Source: Atypon-hosted journal article supplement (https://gvl.blackgold.org/Record/93917/DownloadSupplementalFile?fileId=223)
Supplement: DownloadSupplementalFile [file DownloadSupplementalFile]

# Me Before You

by Jojo Moyes

---

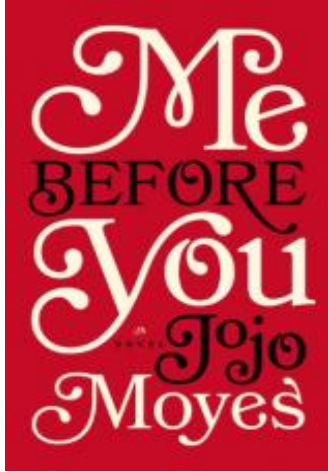

## About the Book

**They had nothing in common until love gave them everything to lose**

Louisa Clark is an ordinary girl living an exceedingly ordinary life --- steady boyfriend, close family --- who has never been farther afield than their tiny village. She takes a badly needed job working for ex-Master of the Universe Will Traynor, who is wheelchair bound after an accident. Will has always lived a huge life --- big deals, extreme sports, worldwide travel --- and now he's pretty sure he cannot live the way he is.

Will is acerbic, moody, bossy --- but Lou refuses to treat him with kid gloves, and soon his happiness means more to her than she expected. When she learns that Will has shocking plans of his own, she sets out to show him that life is still worth living.

*A Love Story* for this generation, ME BEFORE YOU brings to life two people who couldn't have less in common --- a heartbreakingly romantic novel that asks: What do you do when making the person you love happy also means breaking your own heart?

## Discussion Guide

1. If you were Louisa, would you have quit working for the Traynors? If yes, at what point?
2. Were you able to relate to the way Will felt after his accident? What about his outlook on life did you find most difficult to understand or accept?
3. Discuss the meaning of the novel's title. To whom do the "me" and "you" refer?

4. Louisa often finds Mrs. Traynor cold and judgmental. Is there an appropriate way to behave in Mrs. Traynor's situation?
5. What is your opinion of Mr. Traynor? Did it change after you read his side of the story?
6. Why is Louisa able to reach Will when so many others could not?
7. Were you as surprised as Lou to learn of Will's plans?
8. Compare Louisa's relationship with Treena to Will's relationship with Georgina. Do siblings know one another any better simply because they are related?
9. Would Patrick have asked Louisa to move in with him if he hadn't felt threatened by Will? If Louisa had never accepted her job with the Traynors, where would her relationship with Patrick have gone?
10. Discuss Louisa's own secret ties to the castle. Would most girls in her situation have blamed themselves? Should Treena have behaved differently in the aftermath?
11. What did you make of the way Lou's mother, Josie, judges Lou's decisions regarding Will. Is Josie's reaction fair?
12. Before his accident, Will was a philanderer and a corporate raider who would probably never have given Louisa a second look. Why is it that people are so often unable to see what's truly important until they've experienced loss?

## Author Bio

Jojo Moyes is the *New York Times* bestselling author of *ME BEFORE YOU*, *ONE PLUS ONE*, *THE GIRL YOU LEFT BEHIND*, *THE LAST LETTER FROM YOUR LOVER*, *SILVER BAY*, *THE SHIP OF BRIDES* and *HONEYMOON IN PARIS*. She lives with her husband and three children on a farm in Essex, England.

---

### Me Before You

by Jojo Moyes

**Publication Date:** December 31, 2012

**Genres:** Fiction, Romance

**Hardcover:** 384 pages

**Publisher:** Pamela Dorman Books

**ISBN-10:** 0670026603

**ISBN-13:** 9780670026609
